# Supplementary material for: Voltage-reduced low-defect graphene oxide: a high conductivity, near-zero temperature coefficient of resistance material
Source: Royal Society of Chemistry journal article supplement (doi:10.1039/c8nr08285e), 2018-12-10
Supplement: c8nr08285e1.pdf [file c8nr08285e1.pdf]

## Supplementary Information

### Voltage-reduced low-defect graphene oxide: a high conductivity, near-zero temperature coefficient of resistance material

Kevin W. Silverstein,<sup>a</sup> Christian E. Halbig,<sup>b</sup> Jeremy S. Mehta,<sup>a</sup> Anju Sharma,<sup>c</sup> Siegfried Eigler,<sup>b</sup> Jeffrey M. Mativetsky<sup>\*a</sup>

<sup>a</sup> Department of Physics, Applied Physics, and Astronomy, Binghamton University, Binghamton, NY 13902, USA.

<sup>b</sup> Institute of Chemistry and Biochemistry, Freie Universität Berlin, Takustraße 3, 14195 Berlin, Germany.

<sup>c</sup> Small Scale Systems Integration and Packaging Center, Binghamton University, Binghamton, NY 13902, USA.

\* Email: [jmativet@binghamton.edu](mailto:jmativet@binghamton.edu)

|                                             |     |
|---------------------------------------------|-----|
| 1. Oxo-G Sheet Size and Film Thickness..... | S-2 |
| 2. Oxo-G Reduction.....                     | S-3 |
| 3. Variable Temperature Measurements.....   | S-4 |

## 1. Oxo-G Sheet Size and Film Thickness

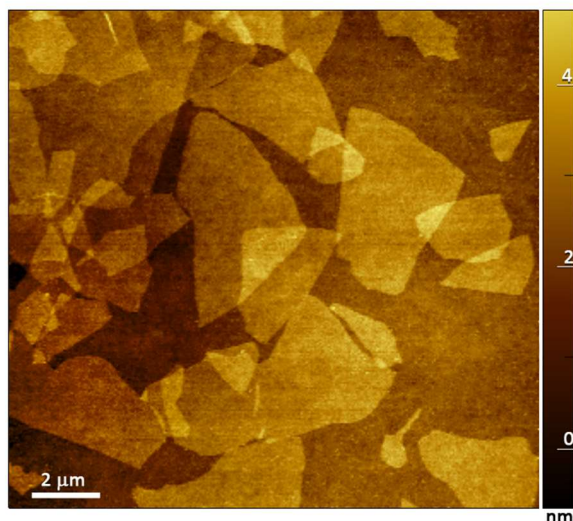

**Figure S-1.** Tapping mode atomic force microscope topography of oxo-G sheets on a glass substrate. The average sheet area based on measurements of 50 sheets is  $10.7 \mu\text{m}^2$  with a standard deviation of  $2.6 \mu\text{m}^2$ .

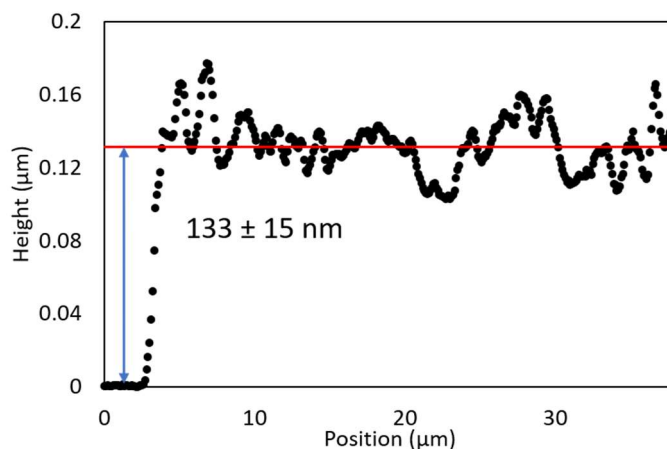

**Figure S-2.** Atomic force microscope line profile, averaged over 50 scan lines, showing the height difference between a bare glass substrate and the surface of a V-roxo-G film. The glass region was exposed by scratching the V-roxo-G film with a sharp probe. The film thickness was determined from the average height difference to be  $133 \pm 15 \text{ nm}$  in this case. Local V-roxo-G film thickness within each electrode gap was measured at two or more locations to confirm that the thickness in a given gap is constant to within about 10%, and to ensure an accurate representation of film thickness when determining film conductivity. The conductivity was found to be the same for all measured V-roxo-G film thicknesses (ranging between 40 and 150 nm).

## 2. Oxo-G Reduction

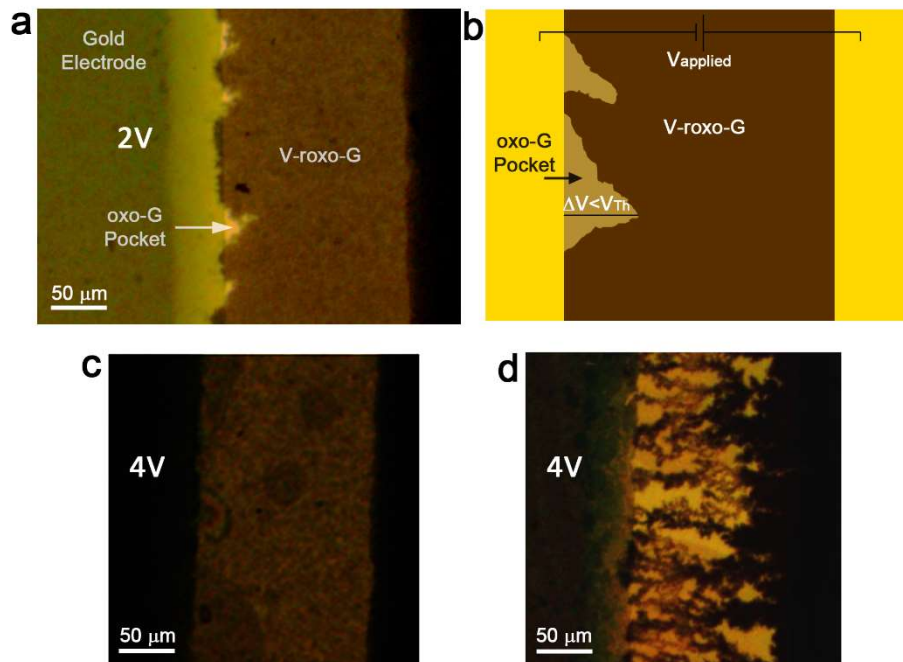

**Figure S-3.** a) Voltage reduction of oxo-G at 2 V for 5 hours at 70% RH showing nearly complete reduction, but also small pockets of unreduced oxo-G. b) Schematic depicting the proposed mechanism for pocket formation: before the V-roxo-G reaches the positive electrode, the potential difference between the V-roxo-G and the positive electrode is sufficient to maintain reduction. However, once V-roxo-G reaches the positive electrode, nearby V-roxo-G is at a potential that is close to that of the positive electrode, halting reduction. A threshold voltage,  $V_{Th}$ , of about 1.5 V is required for reduction to proceed. As shown in (c), reduction can be completed by applying a second reduction step at a higher voltage, 4 V for 1 hour. d) If 4 V is applied from the start, branching V-roxo-G filaments are formed that leave large unreduced pockets of oxo-G. Near-complete reduction can be achieved in tens of minutes by using an intermediate voltage; however, to ensure accurate conductivity measurements, complete reduction was achieved by using a slower 2-step process. The reduction kinetics depend on voltage, film thickness, and humidity. Since a relatively low voltage (low rate) was employed, relatively thick films (40 – 150 nm) and high humidity (70% RH) were used to accelerate the reduction process.

### 3. Variable Temperature Measurements

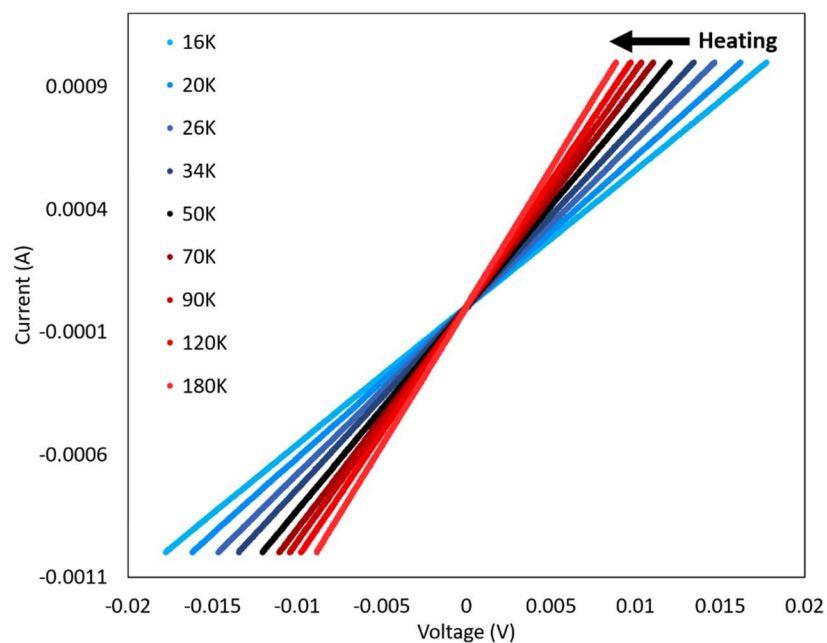

**Figure S-4.** Current-voltage characteristics of V-roxo-G as temperature is varied between 16 and 180 K, showing ohmic behavior. Ohmic behavior was observed over the entire 16 – 373 K range. Temperatures above 180 K are not shown due to the minimal temperature dependence leading to overlap of the I-V curves.
